# Supplementary material for: In-hospital emergencies versus out-of-hospital emergencies admitted to ICU: is the outcome different? An observational study
Source: Research Square preprint supplement (doi:10.21203/rs.3.rs-109006/v2), 2021-02-22
Supplement: Supplementary file 1 [file 4101eb10a9cd0ef07377f825.docx]

**In-hospital emergencies versus out-of-hospital emergencies admitted to ICU: is the outcome different? An observational study**

**Authors:**

Emi Cauchois1, MD; Jérémy Bourenne1, MD; Audrey Le Saux1, MD; Fouad Bouzana1, MD; Antoine Tilmont1, MD ; Charlotte Allez1, MD; Vanessa Pauly2, PhD; Marc Gainnier1, MD PhD ; Julien Carvelli1, MD

**Supplementary Table 2.** Other comorbidities and biological variables without statistical difference between the in-hospital survivors and non-survivors

|  | Survivors  n = 143 | Non-survivors  n = 94 | *p* |
| --- | --- | --- | --- |
| Comorbidities, n(%) |  |  |  |
| Cognitive impairment | 4(3) | 1(1) | NS |
| Psychiatric affection | 19(13) | 14(15) | NS |
| Class III obesity | 4(3) | 2(2) | NS |
| Ethylism | 29(20) | 15(16) | NS |
| Active smoking | 46(32) | 23(24) | NS |
| Daily assistance, n(%) | 31(22) | 26(28) | NS |
| Bedridden, n(%) | 8(6) | 5(5) | NS |
| Admission |  |  |  |
| Hospital-acquired infection, n(%) | 9(6) | 5(5) | NS |
| Biochemistry |  |  |  |
| Haemoglobin, g/dL | 11.9 [10.4-13.6] | 11.8 [9,9-13,2] | NS |
| Lymphocytes, G/L | 1 [0.6-1.6] | 1.1 [0.6-2.5] | NS |
| Absolute Neutrophil Count, G/L | 10 [6.8-15] | 12 [7.5-15] | NS |
| Platelets, G/L | 198 [149-267] | 210 [144-296] | NS |
| Natremia, mmol/L | 139 [135-142] | 139 [136-143] | NS |
| Serum bilirubin, mmol/L | 9 [6-16] | 8 [5-15] | NS |
| PaO2/FiO2 | 250 [150-363] | 228 [140-383] | NS |
| Organ replacement therapies |  |  |  |
| Lenght of catecholamine support, days | 2 [1-3] | 2 [1-4] | NS |
| Length of renal replacement therapy, days | 9 [3-13] | 2 [1-6] | < 0.05 |
| Antibiotic therapy; n(%) | 95(66) | 67(71) | NS |
| Length of antibiotic prescription, days | 5 [0-7] | 5 [0-7] | NS |

*Variables presented as medians [IQR; 25%-75%].*
