# Supplementary material for: In-hospital emergencies versus out-of-hospital emergencies admitted to ICU: is the outcome different? An observational study
Source: Research Square preprint supplement (doi:10.21203/rs.3.rs-109006/v2), 2021-02-22
Supplement: Supplementary file 2 [file 7ef86fbc4fda4a86e76a02d6.docx]

**In-hospital emergencies versus out-of-hospital emergencies admitted to ICU: is the outcome different? An observational study**

**Authors:**

Emi Cauchois1, MD; Jérémy Bourenne1, MD; Audrey Le Saux1, MD; Fouad Bouzana1, MD; Antoine Tilmont1, MD ; Charlotte Allez1, MD; Vanessa Pauly2, PhD; Marc Gainnier1, MD PhD ; Julien Carvelli1, MD

**Supplementary Table 1.** Other comorbidities and biochemical results without statistical difference between the IHE and OHE groups

|  | IHE  n = 74 | OHE  n = 167 | *p* |
| --- | --- | --- | --- |
| Comorbidities, n(%) |  |  |  |
| Cognitive impairment | 1(1) | 4(2) | NS |
| Psychiatric affection | 7(9) | 28(17) | NS |
| Class III obesity | 1(1) | 5(3) | NS |
| Ethylism | 15(20) | 29(17) | NS |
| Active smoking | 18(24) | 52(31) | NS |
| Biochemistry |  |  |  |
| Lymphocytes, G/L | 1 [0.5-1.5] | 1.1 [0.7-2] | NS |
| Absolute Neutrophil Count, G/L | 9.3 [6.8-15] | 11 [7.5-15] | NS |
| Platelets, G/L | 231 [145-305] | 196 [144-267] | NS |
| PT, % | 73 [56-88] | 74 [59-94] | NS |
| INR | 1.22 [1.04-1.42] | 1.22 [1.08-1.48] | NS |
| Serum creatinine, µmol/L | 76 [60-129] | 98 [74-144] | NS |
| Serum urea, mmol /L | 7.8 [4.8-13.6] | 7.5 [5.3-10.8] | NS |
| Natremia, mmol/L | 139 [136-144] | 139 [136-142] | NS |
| Kalemia, mmol/L | 4 [3.6-4.5] | 4 [3.5-4.6] | NS |
| Arterial pCO2, mmHg | 35 [31-43] | 39 [31-49] | NS |
| PaO2/FiO2 | 214 [130-351] | 248 [145-383] | NS |

*IHE: In-Hospital Emergencies, OHE: Out-Of-Hospital Emergencies, PT: Prothrombin Time, INR: International Normalized Ratio. Variables presented as medians [IQR; 25%-75%].*
