# Supplementary material for: In-hospital emergencies versus out-of-hospital emergencies admitted to ICU: is the outcome different? An observational study
Source: Research Square preprint supplement (doi:10.21203/rs.3.rs-109006/v2), 2021-02-22
Supplement: Supplementary file 3 [file f989593a58865bf53d972d27.xlsx]

## Sheet: Feuil1
Nature of the emergency (0 Out-of-Hospital Emergency, 1 In-Hospital Emergency)	Origin (SAMU 0, Emergency Room 1)	Lenght of last hospital stay (days)	Length since dismissal of last hospital stay (months)	Lenght of hospital stay before call (days)	Prior call	Timing (0 : week working hours, 1 : night/weekend/holiday)	Cardiac arrest	Septic shock	Haemorrhagic shock	Cardiogenic shock	Other shock	Cardiogenic acute pulmonary edema	ARDS	Pulmonary embolism	Community acquired pneumonia	Aspiration pneumonia	Hospital acquired pneumonia	Acute respiratory failure in chronic pulmonary disease	Other respiratory failure	Ischemic stroke	Haemorrhagic stroke	Meningitis/other infection	Epilepsy	Other neurological distress	Iatrogenic component	Hospital acquired infection	Localization of hospital acquired infection (1 : catheter or vascular implant, 2 : pulmonary, 3 : abdominal, 4 : urinary)	Age	Gender	Lives at home	Lives in an institution	Independant for daily life activities	Daily help requirement	Bedridden	Diabetes mellitus	Cardiovascular disease	Chronic kidney disease	Cirrhosis	Severe COPD or chronic respiratory disease	Chronic heart failure NYHA III-IV	Ongoing malignancy	Immunosuppression	Cognitive impairment/dementia	Psychiatric affection	Class 3 obesity (BMI>40)	Ethylism	Active smoking	SOFA	SAPS 2
0	1	24	26	NA	NA	1	0	0	0	0	1	0	0	0	0	0	0	0	0	0	0	0	0	0	0	0	NA	35	f	1	0	1	0	0	1	0	0	0	0	0	0	0	0	0	1	0	0	3	15
0	1	NA	NA	NA	NA	1	0	0	0	0	0	0	0	0	0	0	0	0	0	0	0	0	1	0	0	0	NA	29	m	1	0	1	0	0	0	0	0	0	0	0	0	0	0	0	0	0	1	5	25
0	0	NA	NA	NA	NA	0	1	0	0	0	0	0	0	0	0	0	0	0	0	0	0	0	0	0	0	0	NA	76	m	1	0	1	0	0	0	1	0	0	0	0	0	0	0	1	0	0	0	8	59
0	0	NA	NA	NA	NA	1	1	0	0	0	0	0	0	0	0	0	0	0	0	0	0	0	0	0	0	0	NA	59	f	1	0	1	0	0	0	0	0	0	0	0	0	0	0	1	0	0	0	9	76
0	0	NA	NA	NA	NA	1	1	0	0	0	0	0	0	0	0	0	0	0	0	0	0	0	0	0	0	0	NA	60	m	1	0	1	0	0	0	1	0	0	0	0	0	0	0	0	0	0	0	11	77
0	0	NA	NA	NA	NA	1	0	0	0	0	0	0	0	0	0	0	0	0	0	0	0	0	0	1	1	0	NA	84	f	1	0	1	0	1	0	1	0	0	1	0	0	0	0	0	0	0	0	6	60
0	1	5	56	NA	NA	0	0	1	0	0	0	0	0	0	0	0	0	0	0	0	0	0	0	0	0	0	NA	67	f	1	0	0	1	0	0	0	0	0	0	0	0	0	0	1	0	0	1	17	80
0	0	NA	NA	NA	NA	0	0	0	0	0	1	0	0	0	0	0	0	0	0	0	0	0	0	0	1	0	NA	79	f	1	0	0	1	0	0	1	0	0	0	0	0	0	0	0	0	0	0	10	56
0	1	2	55	NA	NA	1	0	0	0	0	0	1	0	0	0	0	0	0	0	0	0	0	0	0	0	0	NA	66	f	1	0	1	0	0	0	0	0	0	0	0	0	0	0	0	0	0	1	4	37
0	0	NA	NA	NA	NA	0	1	0	0	0	0	0	0	0	0	0	0	0	0	0	0	0	0	0	0	0	NA	82	f	1	0	1	0	0	1	1	0	0	0	0	0	0	0	0	0	0	0	10	69
0	0	5	102	NA	NA	1	0	0	0	1	0	0	0	0	0	0	0	0	0	0	0	0	0	0	0	0	NA	72	m	1	0	1	0	0	0	1	0	0	1	0	0	0	0	1	0	0	1	10	41
0	1	NA	NA	NA	NA	1	0	1	0	0	0	0	0	0	0	0	0	0	0	0	0	0	0	0	0	0	NA	42	f	1	0	1	0	0	0	0	0	0	0	0	0	0	0	1	0	1	0	8	40
0	0	NA	NA	NA	NA	1	1	0	0	0	0	0	0	0	0	0	0	0	0	0	0	0	0	0	0	0	NA	63	f	1	0	1	0	0	0	0	0	0	1	0	0	0	0	1	0	0	1	10	55
0	1	4	3	NA	NA	1	0	0	0	0	0	0	0	0	0	0	0	0	0	0	0	0	1	0	0	0	NA	77	f	1	0	0	0	1	0	1	0	0	0	0	0	0	1	1	0	0	0	3	66
0	0	0	NA	NA	NA	0	0	0	0	0	0	0	0	0	0	1	0	0	0	0	0	0	0	0	0	0	NA	64	f	1	0	1	0	0	0	0	0	0	0	0	0	0	0	1	0	1	0	11	77
0	0	0	NA	NA	NA	0	1	0	0	0	0	0	0	0	0	0	0	0	0	0	0	0	0	0	0	0	NA	37	m	1	0	1	0	0	0	0	0	0	0	0	0	0	0	0	0	0	1	7	50
0	0	0	NA	NA	NA	0	1	0	0	0	0	0	0	0	0	0	0	0	0	0	0	0	0	0	0	0	NA	52	m	1	0	1	0	0	0	0	0	0	0	0	0	0	0	0	0	0	0	12	85
0	1	6	1	NA	NA	1	0	0	0	0	0	0	0	0	0	0	0	0	0	0	0	0	1	0	0	0	NA	23	m	1	0	1	0	0	0	0	0	0	0	0	0	0	0	0	0	0	0	4	28
0	0	0	NA	NA	NA	0	0	1	0	0	0	0	0	0	0	0	0	0	0	0	0	0	0	0	0	0	NA	59	m	1	0	1	0	0	1	1	0	0	0	0	0	0	0	1	0	1	1	11	41
0	0	3	8	NA	NA	1	0	0	0	0	0	0	0	0	0	0	0	0	0	0	0	0	1	0	0	0	NA	52	m	1	0	1	0	0	1	0	0	1	0	0	0	0	0	1	0	1	0	8	56
0	1	NA	NA	NA	NA	1	0	1	0	0	0	0	0	0	0	0	0	0	0	0	0	0	0	0	0	0	NA	72	m	1	0	1	0	0	0	1	0	0	0	0	0	0	0	0	0	0	0	8	48
0	1	3	1	NA	NA	0	0	1	0	0	0	0	0	0	0	0	0	0	0	0	0	0	0	0	0	0	NA	39	f	1	0	1	0	0	0	0	0	0	0	0	0	0	0	0	0	0	0	5	22
0	0	NA	NA	NA	NA	0	0	0	1	0	0	0	0	0	0	0	0	0	0	0	0	0	0	0	0	0	NA	77	f	1	0	1	0	0	0	1	0	1	0	0	0	0	0	0	0	1	0	6	52
0	0	11	7	NA	NA	0	0	0	0	0	0	1	0	0	0	0	0	0	0	0	0	0	0	0	0	0	NA	61	m	1	0	1	0	0	1	1	0	0	0	0	0	0	0	0	0	0	1	3	65
0	1	5	37	NA	NA	1	0	0	0	0	0	0	0	0	0	0	0	0	0	0	0	0	1	0	0	0	NA	42	m	1	0	1	0	0	1	0	1	0	0	0	0	0	0	0	0	1	1	7	45
0	0	16	62	NA	NA	0	1	0	0	0	0	0	0	0	0	0	0	0	0	0	0	0	0	0	0	0	NA	54	m	1	0	1	0	0	0	1	0	0	0	0	0	0	1	0	0	0	1	6	48
0	0	0	NA	NA	NA	0	0	0	0	0	0	0	0	0	0	0	0	0	0	0	1	0	0	0	0	0	NA	63	f	1	0	1	0	0	0	1	0	0	0	0	0	0	0	0	0	0	0	3	48
0	0	10	12	NA	NA	1	1	0	0	0	0	0	0	0	0	0	0	0	0	0	0	0	0	0	0	0	NA	45	f	1	0	1	0	0	0	0	0	0	1	0	0	0	0	0	0	0	1	8	72
0	0	2	1	NA	NA	1	0	0	0	0	0	1	0	0	0	0	0	0	0	0	0	0	0	0	0	0	NA	55	f	1	0	1	0	0	0	1	0	0	0	1	0	0	0	0	0	0	0	6	32
0	0	0	NA	NA	NA	0	0	0	0	0	0	0	0	0	0	0	0	0	0	0	1	0	0	0	0	0	NA	77	m	1	0	1	0	0	0	1	0	0	0	0	0	0	0	0	0	0	0	10	61
0	0	0	NA	NA	NA	1	0	0	0	0	0	0	0	0	0	0	0	0	0	0	0	0	1	0	0	0	NA	33	f	1	0	1	0	0	0	1	0	0	0	0	0	0	0	0	0	0	0	6	41
0	1	0	NA	NA	NA	0	0	0	0	0	0	0	0	0	1	0	0	0	0	0	0	0	0	0	0	0	NA	54	m	1	0	1	0	0	0	1	0	0	0	0	0	0	0	0	0	0	1	4	50
0	1	10	6	NA	NA	1	0	0	0	0	0	0	0	0	0	0	0	0	0	0	0	0	1	0	0	0	NA	25	m	1	0	1	0	0	1	0	0	0	0	0	0	0	0	0	0	1	1	16	34
0	1	9	17	NA	NA	1	0	0	0	0	0	0	0	0	1	0	0	0	0	0	0	0	0	0	0	0	NA	70	f	1	0	0	1	0	0	0	0	0	1	0	0	0	0	1	1	0	0	8	67
0	0	2	15	NA	NA	1	1	0	0	0	0	0	0	0	0	0	0	0	0	0	0	0	0	0	0	0	NA	23	m	1	0	1	0	0	0	0	0	0	0	0	0	0	0	0	0	0	0	11	70
0	0	0	NA	NA	NA	0	0	0	0	0	0	0	0	0	0	0	0	0	0	0	1	0	0	0	0	0	NA	64	m	1	0	1	0	0	0	1	0	0	0	0	0	0	0	0	0	0	0	3	43
0	0	0	NA	NA	NA	1	1	0	0	0	0	0	0	0	0	0	0	0	0	0	0	0	0	0	0	0	NA	68	m	1	0	1	0	0	0	1	0	0	0	0	0	0	0	1	0	0	0	10	90
0	1	6	23	NA	NA	1	0	0	0	0	0	0	0	0	0	0	0	0	0	0	1	0	0	0	1	0	NA	80	f	1	0	0	1	0	1	1	1	0	0	0	0	0	0	0	0	0	0	7	70
0	0	6	14	NA	NA	0	1	0	0	0	0	0	0	0	0	0	0	0	0	0	0	0	0	0	0	0	NA	68	m	1	0	1	0	0	1	1	0	0	0	0	0	0	0	0	0	0	0	9	72
0	0	0	NA	NA	NA	0	1	0	0	0	0	0	0	0	0	0	0	0	0	0	0	0	0	0	0	0	NA	64	f	1	0	1	0	0	0	0	0	0	0	0	0	0	0	1	0	0	0	8	64
0	0	0	NA	NA	NA	1	1	0	0	0	0	0	0	0	0	0	0	0	0	0	0	0	0	0	0	0	NA	37	m	1	0	1	0	0	0	0	0	0	0	0	0	0	0	0	0	0	1	9	62
0	1	61	10	NA	NA	1	0	1	0	0	0	0	0	0	0	0	0	0	0	0	0	0	0	0	0	0	NA	45	m	1	0	0	1	0	0	1	0	0	0	0	0	0	0	1	0	0	1	12	36
0	0	0	NA	NA	NA	0	0	1	0	0	0	0	0	0	0	0	0	0	0	0	0	0	0	0	1	0	NA	59	m	1	0	0	1	1	0	0	0	0	0	0	0	0	0	0	0	0	0	6	31
0	0	0	NA	NA	NA	1	1	0	0	0	0	0	0	0	0	0	0	0	0	0	0	0	0	0	0	0	NA	55	m	1	0	1	0	0	0	0	0	0	0	0	0	0	0	0	0	0	1	13	66
0	0	0	NA	NA	NA	0	1	0	0	0	0	0	0	0	0	0	0	0	0	0	0	0	0	0	0	0	NA	76	f	1	0	1	0	0	0	0	0	0	0	0	0	0	0	0	0	0	0	11	68
0	1	0	NA	NA	NA	0	0	1	0	0	0	0	0	0	0	0	0	0	0	0	0	0	0	0	0	0	NA	53	f	1	0	1	0	0	0	0	0	0	1	0	0	0	0	0	0	1	1	11	41
0	0	0	NA	NA	NA	0	1	0	0	0	0	0	0	0	0	0	0	0	0	0	0	0	0	0	0	0	NA	41	m	1	0	1	0	0	1	0	0	0	0	0	0	0	0	0	0	0	0	14	66
0	0	0	NA	NA	NA	0	1	0	0	0	0	0	0	0	0	0	0	0	0	0	0	0	0	0	0	0	NA	59	m	1	0	1	0	0	0	1	0	0	0	0	0	0	0	0	0	0	0	11	73
0	0	0	NA	NA	NA	0	1	0	0	0	0	0	0	0	0	0	0	0	0	0	0	0	0	0	0	0	NA	74	f	1	0	1	0	0	0	1	0	0	0	1	0	0	0	0	0	0	0	9	56
0	0	3	33	NA	NA	1	0	0	0	0	0	1	0	0	0	0	0	0	0	0	0	0	0	0	0	0	NA	64	m	1	0	1	0	0	0	1	0	0	0	1	0	0	0	0	0	1	1	9	43
0	1	0	NA	NA	NA	1	0	0	0	0	1	0	0	0	0	0	0	0	0	0	0	0	0	0	0	0	NA	70	m	1	0	1	0	0	0	1	0	0	0	0	0	0	0	0	0	0	0	9	48
0	1	0	NA	NA	NA	1	0	0	0	0	0	0	0	0	1	0	0	0	0	0	0	0	0	0	0	0	NA	62	f	1	0	1	0	0	0	0	0	0	1	0	0	0	0	0	0	1	1	3	33
0	1	4	8	NA	NA	0	0	0	0	0	0	0	0	0	0	0	0	1	0	0	0	0	0	0	0	0	NA	50	f	1	0	1	0	0	0	0	0	0	1	0	0	0	0	0	1	0	1	3	28
0	0	3	69	NA	NA	0	0	0	0	0	1	0	0	0	0	0	0	0	0	0	0	0	0	0	1	0	NA	80	f	1	0	1	0	0	1	1		0	0	0	0	0	0	0	0	0	1	4	48
0	0	6	1	NA	NA	1	0	0	0	0	1	0	0	0	0	0	0	0	0	0	0	0	0	0	0	0	NA	36	m	1	0	1	0	0	0	1	0	0	0	0	0	0	0	0	0	0	1	6	22
0	0	57	5	NA	NA	1	0	1	0	0	0	0	0	0	0	0	0	0	0	0	0	0	0	0	0	0	NA	77	f	0	1	0	1	0	1	1	1	0	0	0	0	1	0	0	0	0	0	14	59
0	1	0	NA	NA	NA	1	0	0	0	0	0	1	0	0	0	0	0	0	0	0	0	0	0	0	0	0	NA	58	m	1	0	1	0	0	0	1	0	0	0	0	0	0	0	0	0	0	0	2	42
0	0	3	10	NA	NA	1	0	1	0	0	0	0	0	0	0	0	0	0	0	0	0	0	0	0	0	0	NA	51	f	1	0	1	0	0	1	0	1	0	0	0	0	1	0	0	0	0	0	10	48
0	0	0	NA	NA	NA	1	0	0	0	0	0	0	0	0	0	0	0	0	0	0	0	0	1	0	0	0	NA	62	m	1	0	1	0	0	0	1	0	0	0	0	0	0	0	0	0	0	0	12	44
0	0	0	NA	NA	NA	1	0	0	0	0	0	0	0	0	0	0	0	0	0	0	1	0	0	0	0	0	NA	76	f	1	0	0	1	0	1	1	0	0	0	0	0	0	0	1	0	0	1	8	75
0	0	0	NA	NA	NA	1	0	0	0	0	0	0	0	0	0	0	0	0	0	0	1	0	0	0	0	0	NA	70	m	1	0	1	0	0	0	0	0	0	0	0	0	0	0	0	0	0	0	4	74
0	1	0	NA	NA	NA	1	0	0	0	0	0	0	0	0	0	0	0	1	0	0	0	0	0	0	0	0	NA	68	m	1	0	1	0	0	0	0	0	0	0	0	0	0	0	0	0	1	1	4	33
0	0	0	NA	NA	NA	1	1	0	0	0	0	0	0	0	0	0	0	0	0	0	0	0	0	0	0	0	NA	82	f	1	0	1	1	0	0	1	0	0	0	0	0	0	0	0	0	0	0	7	62
0	1	2	10	NA	NA	0	0	0	0	0	0	0	0	0	0	0	0	0	0	0	0	0	1	0	0	0	NA	54	m	1	0	1	1	0	0	1	0	0	0	0	0	0	0	0	0	1	0	4	22
0	0	0	NA	NA	NA	0	0	0	0	0	0	0	0	0	0	0	0	0	0	0	1	0	0	0	0	0	NA	45	m	1	0	1	0	0	0	0	0	0	0	0	0	0	0	0	0	0	0	8	64
0	0	0	NA	NA	NA	0	1	0	0	0	0	0	0	0	0	0	0	0	0	0	0	0	0	0	0	0	NA	70	m	1	0	1	0	0	0	1	0	0	0	0	0	0	0	0	0	0	0	11	57
0	1	10	6	NA	NA	1	0	1	0	0	0	0	0	0	0	0	0	0	0	0	0	0	0	0	0	0	NA	52	m	1	0	1	0	0	0	1	0	0	0	0	0	1	0	0	0	0	0	9	35
0	0	0	NA	NA	NA	1	1	0	0	0	0	0	0	0	0	0	0	0	0	0	0	0	0	0	0	0	NA	56	m	1	0	1	0	0	1	1	0	0	0	0	0	0	0	0	0	0	0	8	63
0	0	0	NA	NA	NA	0	1	0	0	0	0	0	0	0	0	0	0	0	0	0	0	0	0	0	0	0	NA	77	f	1	0	1	0	0	0	1	0	0	0	0	0	0	0	0	0	0	0	12	70
0	0	0	NA	NA	NA	1	1	0	0	0	0	0	0	0	0	0	0	0	0	0	0	0	0	0	0	0	NA	84	m	1	0	1	0	0	0	1	0	0	0	0	0	0	0	0	0	0	0	9	68
0	1	0	NA	NA	NA	0	0	0	0	0	0	0	0	0	0	0	0	0	0	0	1	0	0	0	1	0	NA	79	m	1	0	1	0	0	0	1	0	0	0	0	0	0	0	0	0	0	0	9	63
0	0	0	NA	NA	NA	1	1	0	0	0	0	0	0	0	0	0	0	0	0	0	0	0	0	0	0	0	NA	72	m	1	0	1	0	0	0	1	0	0	0	0	0	0	0	0	0	0	0	8	72
0	0	0	NA	NA	NA	0	1	0	0	0	0	0	0	0	0	0	0	0	0	0	0	0	0	0	0	0	NA	68	f	1	0	1	0	0	1	1	0	0	0	0	0	0	0	1	1	0	0	11	57
0	1	0	NA	NA	NA	1	0	1	0	0	0	0	0	0	0	0	0	0	0	0	0	0	0	0	0	0	NA	59	f	1	0	1	0	0	0	0	0	0	0	0	0	0	0	0	0	1	0	4	35
0	1	0	NA	NA	NA	1	0	1	0	0	0	0	0	0	0	0	0	0	0	0	0	0	0	0	0	0	NA	51	m	1	0	1	0	0	1	1	0	0	0	0	0	0	0	0	0	0	0	12	64
0	0	6	6	NA	NA	1	1	0	0	0	0	0	0	0	0	0	0	0	0	0	0	0	0	0	0	0	NA	70	m	1	0	0	1	0	0	0	0	0	0	0	1	1	0	0	0	0	0	12	60
0	0	2	7	NA	NA	0	1	0	0	0	0	0	0	0	0	0	0	0	0	0	0	0	0	0	0	0	NA	43	m	1	0	0	1	0	1	0	0	0	0	0	0	0	0	1	0	1	1	13	83
0	1	0	NA	NA	NA	0	0	0	0	0	0	0	0	0	0	0	0	0	0	0	0	0	1	0	0	0	NA	58	m	1	0	1	0	0	0	0	0	0	0	0	0	0	0	0	0	1	0	4	22
0	1	0	NA	NA	NA	1	0	0	0	0	0	0	0	0	0	0	0	0	1	0	0	0	0	0	0	0	NA	64	f	1	0	1	0	0	0	0	0	0	0	0	0	0	0	0	0	1	1	4	32
0	1	3	19	NA	NA	1	0	0	0	0	1	0	0	0	0	0	0	0	0	0	0	0	0	0	0	0	NA	69	m	1	0	1	0	0	0	1	0	0	0	0	0	0	0	1	0	0	0	3	29
0	0	0	NA	NA	NA	1	1	0	0	0	0	0	0	0	0	0	0	0	0	0	0	0	0	0	0	0	NA	65	f	1	0	1	0	0	0	0	0	0	0	0	0	0	0	1	0	0	0	10	65
0	1	4	18	NA	NA	1	0	1	0	0	0	0	0	0	0	0	0	0	0	0	0	0	0	0	0	0	NA	49	m	1	0	0	1	0	0	1	0	0	0	0	0	0	0	0	0	0	0	10	40
0	0	0	NA	NA	NA	0	1	0	0	0	0	0	0	0	0	0	0	0	0	0	0	0	0	0	0	0	NA	51	f	1	0	1	0	0	0	0	0	0	0	0	0	0	0	0	0	0	1	11	53
0	1	0	NA	NA	NA	1	0	0	0	0	1	0	0	0	0	0	0	0	0	0	0	0	0	0	0	0	NA	26	f	1	0	1	0	0	0	0	0	0	0	0	0	0	0	0	0	0	0	6	25
0	1	9	65	NA	NA	1	0	0	0	1	0	0	0	0	0	0	0	0	0	0	0	0	0	0	0	0	NA	64	f	1	0	1	0	0	0	1	0	0	0	0	0	0	0	0	0	0	0	4	39
0	1	0	NA	NA	NA	1	0	0	0	0	0	0	0	0	0	0	0	0	0	0	0	0	1	0	0	0	NA	46	m	1	0	0	1	0	0	0	0	0	0	0	0	0	0	1	0	1	1	4	35
0	0	0	NA	NA	NA	1	1	0	0	0	0	0	0	0	0	0	0	0	0	0	0	0	0	0	0	0	NA	62	f	1	0	1	0	0	1	1	0	0	0	0	0	0	0	0	0	0	0	11	85
0	1	0	NA	NA	NA	0	0	0	0	0	0	0	0	0	1	0	0	0	0	0	0	0	0	0	0	0	NA	46	m	1	0	1	0	0	0	0	0	0	0	0	0	0	0	0	0	0	0	5	25
0	0	0	NA	NA	NA	0	0	0	0	0	0	0	0	0	0	0	0	0	0	0	1	0	0	0	1	0	NA	73	m	1	0	1	0	0	0	1	0	0	0	0	0	0	0	0	0	0	0	12	67
0	0	0	NA	NA	NA	0	0	0	0	0	0	0	0	0	1	0	0	0	0	0	0	0	0	0	0	0	NA	57	m	1	0	1	0	0	0	0	0	0	0	0	0	0	0	0	0	0	1	5	33
0	0	0	NA	NA	NA	0	0	0	1	0	0	0	0	0	0	0	0	0	0	0	0	0	0	0	0	0	NA	39	m	1	0	1	0	0	0	0	0	1	0	0	0	0	0	0	0	1	0	13	37
0	0	11	75	NA	NA	1	0	0	0	0	0	0	0	0	0	0	0	0	0	0	0	0	1	0	0	0	NA	42	f	1	0	1	0	0	0	0	0	0	0	0	0	0	0	0	0	0	0	5	51
0	0	0	NA	NA	NA	1	0	0	0	0	0	0	0	0	0	0	0	0	0	0	1	0	0	0	0	0	NA	68	m	1	0	1	0	0	0	1	0	0	0	0	0	0	0	0	0	0	1	7	57
0	0	2	31	NA	NA	1	1	0	0	0	0	0	0	0	0	0	0	0	0	0	0	0	0	0	0	0	NA	53	m	1	0	1	0	0	0	0	0	0	0	0	0	0	0	0	0	0	1	9	59
0	1	0	NA	NA	NA	1	0	0	0	0	0	0	0	0	0	0	0	1	0	0	0	0	0	0	0	0	NA	72	m	1	0	1	0	0	1	1	0	0	0	0	0	0	0	0	0	0	0	4	36
0	1	0	NA	NA	NA	1	0	1	0	0	0	0	0	0	0	0	0	0	0	0	0	0	0	0	0	0	NA	49	m	1	0	1	0	0	0	0	0	0	0	0	0	1	0	0	0	1	1	12	31
0	0	0	NA	NA	NA	1	0	0	0	0	0	0	0	0	0	0	0	0	0	0	1	0	0	0	0	0	NA	70	m	1	0	1	0	0	1	1	0	0	0	0	0	0	0	0	0	0	0	7	67
0	0	0	NA	NA	NA	1	0	0	0	0	0	0	0	0	0	0	0	0	0	0	0	0	0	1	0	0	NA	68	m	1	0	1	0	0	0	1	0	0	0	0	0	0	0	0	0	0	1	14	71
0	0	0	NA	NA	NA	1	0	0	0	0	0	0	0	0	0	0	0	1	0	0	0	0	0	0	0	0	NA	69	m	1	0	1	0	0	1	1	0	0	1	0	0	0	0	0	0	1	1	7	38
0	1	0	NA	NA	NA	1	0	1	0	0	0	0	0	0	0	0	0	0	0	0	0	0	0	0	0	0	NA	55	m	1	0	0	1	0	0	0	0	0	0	0	0	0	0	0	0	0	0	10	60
0	1	0	NA	NA	NA	0	0	1	0	0	0	0	0	0	0	0	0	0	0	0	0	0	0	0	0	0	NA	35	f	1	0	1	0	0	0	0	0	0	0	0	0	0	0	0	0	0	0	6	27
0	0	0	NA	NA	NA	1	1	0	0	0	0	0	0	0	0	0	0	0	0	0	0	0	0	0	0	0	NA	42	m	1	0	1	0	0	0	0	0	0	0	0	0	0	0	0	0	0	1	11	54
0	1	0	NA	NA	NA	1	1	0	0	0	0	0	0	0	0	0	0	0	0	0	0	0	0	0	0	0	NA	52	m	1	0	1	0	0	0	1	0	0	0	0	0	0	0	0	0	0	1	14	86
0	0	1	87	NA	NA	0	0	0	0	0	0	0	0	0	0	0	0	0	0	0	1	0	0	0	0	0	NA	71	m	1	0	1	0	0	0	1	0	0	0	0	0	0	0	0	0	0	1	6	60
0	0	0	NA	NA	NA	0	0	0	0	0	0	0	0	0	0	0	0	0	0	0	1	0	0	0	0	0	NA	71	f	1	0	1	0	0	0	1	0	0	0	0	1	0	0	0	0	0	1	3	84
0	0	0	NA	NA	NA	1	0	0	0	0	0	0	0	0	0	0	0	0	0	0	1	0	0	0	0	0	NA	63	m	0	1	0	1	0	1	1	1	0	0	0	0	0	0	0	0	0	1	12	86
0	0	0	NA	NA	NA	1	1	0	0	0	0	0	0	0	0	0	0	0	0	0	0	0	0	0	0	0	NA	76	m	1	0	0	1	0	1	1	0	0	0	0	0	0	0	0	0	0	0	6	61
0	1	0	NA	NA	NA	0	0	0	0	0	0	0	0	0	0	0	0	0	0	0	1	0	0	0	0	0	NA	81	f	1	0	1	0	0	0	1	0	0	0	0	0	0	0	0	0	0	0	7	52
0	1	2	99	NA	NA	1	0	1	0	0	0	0	0	0	0	0	0	0	0	0	0	0	0	0	0	0	NA	70	m	1	0	1	0	0	0	0	0	0	0	0	0	0	0	0	0	0	0	11	52
0	0	0	NA	NA	NA	1	0	0	0	0	0	0	0	0	0	0	0	0	0	1	0	0	0	0	1	0	NA	74	m	1	0	1	0	0	1	1	0	0	0	0	0	0	0	0	0	0	0	5	62
0	0	6	19	NA	NA	0	1	0	0	0	0	0	0	0	0	0	0	0	0	0	0	0	0	0	0	0	NA	78	m	1	0	1	0	0	0	1	0	0	1	1	0	0	0	0	0	0	0	9	78
0	0	0	NA	NA	NA	1	0	0	0	0	0	1	0	0	0	0	0	0	0	0	0	0	0	0	0	0	NA	40	m	1	0	1	0	0	0	1	0	0	0	0	0	0	0	0	0	0	1	8	63
0	1	0	NA	NA	NA	1	0	1	0	0	0	0	0	0	0	0	0	0	0	0	0	0	0	0	0	1	1	65	f	1	0	0	1	0	0	0	0	0	0	0	0	0	0	0	0	0	0	7	31
0	0	0	NA	NA	NA	1	1	0	0	0	0	0	0	0	0	0	0	0	0	0	0	0	0	0	0	0	NA	75	m	1	0	1	0	0	1	0	0	0	0	0	0	0	0	0	0	0	1	12	73
0	0	4	92	NA	NA	0	1	0	0	0	0	0	0	0	0	0	0	0	0	0	0	0	0	0	0	0	NA	78	f	1	0	1	0	0	1	1	0	0	0	0	0	0	0	0	0	0	0	7	65
0	0	14	14	NA	NA	1	1	0	0	0	0	0	0	0	0	0	0	0	0	0	0	0	0	0	0	0	NA	56	m	1	0	1	0	0	0	0	0	0	0	0	0	0	0	1	0	0	1	9	58
0	0	0	NA	NA	NA	0	1	0	0	0	0	0	0	0	0	0	0	0	0	0	0	0	0	0	0	0	NA	26	f	1	0	1	0	0	0	0	0	0	0	0	0	0	0	0	0	0	0	12	52
0	1	0	NA	NA	NA	1	0	0	0	0	0	0	0	0	0	0	0	0	0	0	0	0	1	0	0	0	NA	52	m	1	0	1	0	0	0	0	0	0	0	0	0	0	0	0	0	0	1	5	31
0	0	12	10	NA	NA	1	0	0	0	0	0	1	0	0	0	0	0	0	0	0	0	0	0	0	0	0	NA	73	m	1	0	1	0	0	0	1	0	0	0	0	0	0	0	0	0	0	0	4	65
0	0	16	9	NA	NA	1	0	0	0	0	0	0	0	0	0	0	0	0	0	0	0	0	1	0	0	0	NA	51	m	1	0	1	0	0	0	0	0	0	0	0	0	0	1	0	0	1	1	5	42
0	0	0	NA	NA	NA	1	0	0	1	0	0	0	0	0	0	0	0	0	0	0	0	0	0	0	0	0	NA	58	m	1	0	1	0	0	0	0	0	0	0	0	0	0	0	0	0	1	0	10	26
0	0	5	28	NA	NA	1	0	0	0	0	0	0	0	0	0	0	0	0	0	0	1	0	0	0	0	0	NA	54	m	1	0	1	0	0	0	1	0	0	0	0	0	0	0	0	0	0	0	4	48
0	1	0	NA	NA	NA	1	0	1	0	0	0	0	0	0	0	0	0	0	0	0	0	0	0	0	0	0	NA	19	f	1	0	1	0	0	0	0	0	0	0	0	0	0	0	0	0	0	0	4	38
0	0	0	NA	NA	NA	1	0	0	0	0	0	0	0	0	0	0	0	0	0	0	0	0	1	0	0	0	NA	74	m	1	0	1	0	0	0	1	0	0	0	0	0	0	0	0	0	0	0	6	40
0	0	9	65	NA	NA	0	1	0	0	0	0	0	0	0	0	0	0	0	0	0	0	0	0	0	0	0	NA	65	f	1	0	1	0	0	1	1	0	0	0	0	0	0	0	0	0	0	0	12	68
0	1	12	36	NA	NA	1	0	0	0	0	0	0	0	0	0	0	0	1	0	0	0	0	0	0	0	0	NA	81	m	1	0	1	0	0	1	1	0	0	1	0	0	0	0	0	0	0	0	2	46
0	0	0	NA	NA	NA	1	0	0	0	0	0	1	0	0	0	0	0	0	0	0	0	0	0	0	0	0	NA	54	f	1	0	1	0	0	1	1	0	0	0	0	0	0	0	0	0	1	0	8	26
0	0	0	NA	NA	NA	1	0	0	0	0	0	0	0	0	0	0	0	0	0	0	1	0	0	0	0	0	NA	61	m	1	0	1	0	0	0	0	0	0	0	0	0	0	0	0	0	0	0	11	44
0	0	4	19	NA	NA	0	1	0	0	0	0	0	0	0	0	0	0	0	0	0	0	0	0	0	0	0	NA	54	f	0	1	0	1	0	0	0	0	0	0	0	0	0	1	0	0	0	0	6	52
0	0	0	NA	NA	NA	0	0	0	0	0	0	0	0	0	0	0	0	0	0	0	1	0	0	0	0	0	NA	48	m	1	0	1	0	0	0	0	0	0	0	0	0	0	0	0	0	0	0	7	48
0	1	11	24	NA	NA	1	0	0	0	0	0	0	0	0	0	0	0	0	0	0	0	0	1	0	0	0	NA	37	f	1	0	1	0	0	0	0	0	0	0	0	0	0	0	0	0	0	0	6	28
0	1	5	18	NA	NA	0	0	0	0	1	0	0	0	0	0	0	0	0	0	0	0	0	0	0	0	0	NA	79	f	1	0	1	0	0	0	1	0	0	0	0	0	0	0	0	0	0	0		11
0	0	0	NA	NA	NA	1	0	1	0	0	0	0	0	0	0	0	0	0	0	0	0	0	0	0	0	0	NA	85	m	1	0	1	0	0	0	1	0	0	0	0	0	0	0	0	0	0	0	10	49
0	1	0	NA	NA	NA	1	0	0	0	0	1	0	0	0	0	0	0	0	0	0	0	0	0	0	0	0	NA	65	m	1	0	1	0	0	1	0	0	0	0	0	0	0	0	0	0	0	0	8	29
0	0	0	NA	NA	NA	1	0	0	0	0	0	0	0	0	0	0	0	0	0	1	0	0	0	0	0	0	NA	56	m	1	0	1	0	0	0	0	0	0	0	0	0	0	0	1	0	0	0	11	65
0	1	0	NA	NA	NA	1	0	1	0	0	0	0	0	0	0	0	0	0	0	0	0	0	0	0	0	0	NA	56	f	1	0	1	0	0	0	1	0	0	0	0	0	0	0	0	0	0	0	11	51
0	0	0	NA	NA	NA	0	0	0	0	0	0	1	0	0	0	0	0	0	0	0	0	0	0	0	0	0	NA	71	f	1	0	1	0	0	0	0	0	0	0	0	0	0	0	0	0	0	1	3	46
0	0	0	NA	NA	NA	1	0	0	0	0	0	0	0	0	0	0	0	1	0	0	0	0	0	0	0	0	NA	69	m	1	0	1	0	0	0	1	0	0	1	0	0	0	0	0	0	0	0	3	33
0	1	0	NA	NA	NA	1	0	1	0	0	0	0	0	0	0	0	0	0	0	0	0	0	0	0	0	0	NA	65	m	1	0	1	0	0	0	0	0	0	0	0	0	0	0	0	0	1	1	14	63
0	0	0	NA	NA	NA	1	1	0	0	0	0	0	0	0	0	0	0	0	0	0	0	0	0	0	0	0	NA	55	m	1	0	1	0	0	0	0	0	0	0	0	0	0	0	0	0	0	0	7	62
0	1	0	NA	NA	NA	1	0	1	0	0	0	0	0	0	0	0	0	0	0	0	0	0	0	0	0	0	NA	57	m	1	0	1	0	0	0	1	0	0	0	0	0	0	0	0	0	0	0	11	28
0	0	0	NA	NA	NA	1	0	0	0	0	0	0	0	0	0	0	0	0	0	0	1	0	0	0	0	0	NA	71	m	1	0	1	0	0	0	0	0	0	0	0	0	0	0	0	0	1	0	7	62
0	1	93	23	NA	NA	1	0	0	0	0	0	0	0	0	0	0	0	0	0	0	0	0	0	1	0	0	NA	68	f	1	0	1	0	0	0	0	0	0	0	0	0	0	0	1	0	0	0	5	41
0	0	12	2	NA	NA	1	0	0	0	0	0	0	0	0	0	0	0	0	0	0	0	0	0	1	0	0	NA	19	f	1	0	1	0	0	0	0	0	0	0	0	0	0	0	1	0	0	0	4	48
0	1	14	35	NA	NA	1	0	1	0	0	0	0	0	0	0	0	0	0	0	0	0	0	0	0	0	0	NA	71	f	1	0	1	0	0	0	1	0	0	0	0	0	0	0	0	0	0	0	10	41
0	0	4	2	NA	NA	0	1	0	0	0	0	0	0	0	0	0	0	0	0	0	0	0	0	0	0	0	NA	73	m	1	0	1	0	0	0	1	1	0	0	0	0	1	0	0	0	0	0	10	50
0	1	0	NA	NA	NA	1	0	0	0	0	0	0	0	0	1	0	0	0	0	0	0	0	0	0	0	0	NA	63	m	0	1	0	1	0	0	0	0	0	0	0	0	0	0	1	0	0	0	6	30
0	0	1	7	NA	NA	1	1	0	0	0	0	0	0	0	0	0	0	0	0	0	0	0	0	0	0	0	NA	66	f	1	0	1	0	0	1	1	1	0	1	0	0	1	0	0	1	1	0	14	88
0	1	0	NA	NA	NA	0	1	0	0	0	0	0	0	0	0	0	0	0	0	0	0	0	0	0	0	0	NA	47	m	1	0	1	0	0	0	0	0	0	0	0	0	0	0	0	0	0	0	8	59
0	1	0	NA	NA	NA	0	0	0	0	0	1	0	0	0	0	0	0	0	0	0	0	0	0	0	0	0	NA	62	m	1	0	1	0	0	0	0	0	0	0	0	0	0	0	0	0	0	0	11	38
0	1	0	NA	NA	NA	0	0	0	0	0	0	0	0	0	0	0	0	0	0	0	1	0	0	0	0	0	NA	62	f	1	0	1	0	0	1	1	0	0	0	0	0	0	0	0	0	0	0	4	46
0	1	28	5	NA	NA	1	0	0	0	0	1	0	0	0	0	0	0	0	0	0	0	0	0	0	1	0	NA	68	f	1	0	0	1	0	1	1	0	0	0	0	0	0	0	0	0	0	0	10	44
0	0	0	NA	NA	NA	1	0	1	0	0	0	0	0	0	0	0	0	0	0	0	0	0	0	0	0	0	NA	72	m	1	0	1	0	0	0	1	0	0	0	0	0	0	0	0	0	1	1	11	46
0	0	0	NA	NA	NA	1	1	0	0	0	0	0	0	0	0	0	0	0	0	0	0	0	0	0	0	0	NA	61	f	0	1	0	1	0	0	0	0	0	0	0	0	0	0	1	0	0	0	12	62
0	1	0	NA	NA	NA	1	0	0	0	0	1	0	0	0	0	0	0	0	0	0	0	0	0	0	1	0	NA	67	f	1	0	1	0	0	1	0	0	0	0	0	0	0	0	0	0	0	0	15	47
0	0	0	NA	NA	NA	0	0	0	0	0	0	0	0	0	0	0	0	0	0	1	0	0	0	0	0	0	NA	88	f	1	0	1	0	0	0	1	0	0	0	0	0	0	0	0	0	0	0	6	62
0	1	6	5	NA	NA	0	0	0	0	0	0	0	0	0	0	0	0	1	0	0	0	0	0	0	0	0	NA	61	m	1	0	1	0	0	0	1	0	0	0	0	0	0	0	1	0	0	1	6	44
0	1	0	NA	NA	NA	1	0	0	0	0	0	0	0	0	1	0	0	0	0	0	0	0	0	0	0	0	NA	72	f	1	0	0	1	0	0	1	0	0	0	0	0	0	0	0	0	0	0	13	91
0	0	0	NA	NA	NA	1	1	0	0	0	0	0	0	0	0	0	0	0	0	0	0	0	0	0	0	0	NA	66	f	1	0	0	1	0	0	1	0	0	0	0	0	0	0	0	0	1	1	13	44
0	0	4	4	NA	NA	1	1	0	0	0	0	0	0	0	0	0	0	0	0	0	0	0	0	0	0	0	NA	84	f	1	0	1	0	0	1	1	1	0	0	0	0	0	0	0	0	0	0	12	68
0	1	0	NA	NA	NA	1	0	0	0	0	0	0	0	0	0	0	0	0	1	0	0	0	0	0	0	0	NA	71	f	1	0	1	0	0	0	0	0	0	0	0	0	0	0	0	0	0	0	5	62
0	1	4	64	NA	NA	0	0	0	0	0	0	0	0	0	0	0	0	0	0	0	0	0	1	0	0	0	NA	44	m	1	0	1	0	0	0	0	0	1	0	0	0	0	0	0	0	1	1	5	22
0	1	4	68	NA	NA	1	1	0	0	0	0	0	0	0	0	0	0	0	0	0	0	0	0	0	0	0	NA	25	m	1	0	1	0	0	0	1	0	0	0	0	0	0	0	0	0	0	1	9	52
0	0	1	118	NA	NA	1	0	0	0	0	0	0	0	0	1	0	0	0	0	0	0	0	0	0	0	0	NA	62	f	1	0	1	0	0	0	0	0	0	0	0	0	0	0	0	0	0	0	4	31
0	0	0	NA	NA	NA	0	1	0	0	0	0	0	0	0	0	0	0	0	0	0	0	0	0	0	0	0	NA	66	m	0	1	0	1	0	0	0	0	0	0	0	0	0	0	1	0	0	0	10	66
0	0	0	NA	NA	NA	0	0	0	0	0	0	0	0	0	0	0	0	0	0	0	1	0	0	0	0	0	NA	76	m	1	0	1	0	0	1	1	0	0	0	0	0	0	0	0	0	0	0	6	44
0	1	0	NA	NA	NA	1	0	0	0	1	0	0	0	0	0	0	0	0	0	0	0	0	0	0	0	0	NA	63	m	1	0	1	0	0	0	0	0	0	0	0	0	0	0	0	0	0	1	8	28
1	NA	NA	NA	7	0	1	0	0	0	0	0	0	0	0	0	0	1	0	0	0	0	0	0	0	0	1	2	71	m	1	0	1	0	0	1	1	0	0	0	0	0	0	0	0	0	0	0	3	41
1	NA	NA	NA	3	0	0	0	0	0	0	0	0	0	0	0	0	0	0	0	0	0	0	0	1	0	0	NA	47	m	1	0	0	1	0	0	0	0	1	0	0	0	0	0	0	0	1	1	13	49
1	NA	NA	NA	9	1	1	1	0	0	0	0	0	0	0	0	0	0	0	0	0	0	0	0	0	0	0	NA	75	m	1	0	0	1	1	1	1	0	0	1	0	0	0	0	0	0	1	1	13	82
1	NA	NA	NA	4	0	0	0	0	0	0	0	0	0	0	1	0	0	0	0	0	0	0	0	0	0	0	NA	53	f	1	0	1	0	0	0	0	0	0	0	0	0	0	0	1	1	0	0	4	27
1	NA	NA	NA	2	0	1	0	0	0	0	1	0	0	0	0	0	0	0	0	0	0	0	0	0	1	0	NA	62	m	1	0	1	0	0	0	1	0	0	0	0	1	1	0	0	0	0	0	8	36
1	NA	NA	NA	2	0	1	0	0	0	0	1	0	0	0	0	0	0	0	0	0	0	0	0	0	1	0	NA	60	m	1	0	1	0	0	0	1	0	0	0	1	0	0	0	0	0	0	0	7	66
1	NA	NA	NA	13	1	0	0	1	0	0	0	0	0	0	0	0	0	0	0	0	0	0	0	0	0	0	NA	65	m	1	0	0	1	0	1	1	0	0	0	0	1	0	0	0	0	0	0	4	53
1	NA	NA	NA	3	0	1	0	0	0	0	0	0	0	0	0	0	0	0	0	0	0	0	1	0	0	0	NA	62	m	1	0	1	0	0	0	1	0	0	0	0	0	0	0	0	0	0	0	7	32
1	NA	NA	NA	2	0	1	0	0	0	0	0	1	0	0	0	0	0	0	0	0	0	0	0	0	0	0	NA	52	m	1	0	1	0	0	0	1	0	0	0	0	0	0	0	0	0	0	0	7	25
1	NA	NA	NA	4	0	0	0	0	0	0	0	0	0	0	0	0	0	0	0	0	0	0	0	1	1	0	NA	76	m	1	0	0	1	0	1	1	1	1	0	0	0	0	0	0	0	1	0	8	58
1	NA	NA	NA	30	0	0	0	1	0	0	0	0	0	0	0	0	0	0	0	0	0	0	0	0	0	0	NA	58	f	1	0	0	1	0	0	0	0	0	0	0	0	1	0	0	0	0	0	3	25
1	NA	NA	NA	11	1	0	0	0	0	0	0	0	0	0	0	0	0	0	1	0	0	0	0	0	0	0	NA	86	m	1	0	1	0	0	0	1	0	0	0	1	0	0	0	0	0	0	0	9	35
1	NA	NA	NA	7	0	1	0	0	0	0	0	0	0	0	0	0	0	0	0	0	0	0	1	0	0	0	NA	83	m	0	1	0	1	0	1	1	0	0	0	0	0	0	0	0	0	0	0	11	94
1	NA	NA	NA	2	0	0	0	0	1	0	0	0	0	0	0	0	0	0	0	0	0	0	0	0	1	0	NA	67	f	1	0	0	1	0	1	1	0	0	0	0	0	0	0	1	0	0	1	6	42
1	NA	NA	NA	7	0	0	1	0	0	0	0	0	0	0	0	0	0	0	0	0	0	0	0	0	0	0	NA	63	m	1	0	1	0	0	0	1	0	0	0	0	0	0	0	0	0	0	0	14	85
1	NA	NA	NA	4	0	0	0	0	0	0	1	0	0	0	0	0	0	0	0	0	0	0	0	0	1	0	NA	63	f	1	0	0	1	0	0	1	0	0		0	1	1	0	0	0	0	0	8	45
1	NA	NA	NA	2	0	1	0	0	0	0	0	0	0	0	0	1	0	0	0	0	0	0	0	0	0	0	NA	55	m	1	0	1	0	0	0	0	0	0	0	0	0	1	0	0	0	0	0	7	37
1	NA	NA	NA	21	0	1	0	0	0	0	0	0	0	0	0	1	0	0	0	0	0	0	0	0	0	0	NA	62	m	1	0	1	0	0	1	0	0	0	0	0	0	0	0	0	0	0	0	12	45
1	NA	NA	NA	2	0	0	0	0	0	0	0	0	0	0	0	0	0	1	0	0	0	0	0	0	1	0	NA	82	m	1	0	1	0	0	0	1	0	0	0	0	1	1	0	0	0	0	0	8	46
1	NA	NA	NA	27	0	1	0	0	0	0	0	0	0	0	0	0	0	0	1	0	0	0	0	0	0	1	3	68	m	1	0	0	1	0	1	1	0	1	0	0	0	1	0	0	0	0	0	7	41
1	NA	NA	NA	7	0	1	0	1	0	0	0	0	0	0	0	0	0	0	0	0	0	0	0	0	0	0	NA	70	m	1	0	0	1	0	0	0	0	0	0	0	1	0	0	0	0	0	0	8	48
1	NA	NA	NA	3	0	1	0	0	0	0	0	0	0	0	0	1	0	0	0	0	0	0	0	0	0	0	NA	52	m	1	0	1	0	0	0	1	0	0	0	0	0	0	0	0	0	1	1	4	37
1	NA	NA	NA	28	0	0	0	0	1	0	0	0	0	0	0	0	0	0	0	0	0	0	0	0	1	0	NA	54	m	1	0	0	0	1	0	1	0	0	0	0	0	0	0	0	0	0	0	7	34
1	NA	NA	NA	2	0	0	0	0	0	0	0	0	0	0	0	0	0	0	0	0	0	0	0	1	0	0	NA	25	m	1	0	1	0	0	0	0	0	0	0	0	0	0	0	0	0	0	1	0	15
1	NA	NA	NA	5	0	0	0	0	0	0	0	0	0	0	0	0	0	0	0	0	0	0	0	1	0	0	NA	75	f	1	0	0	1	0	0	0	0	0	0	0	0	1	0	0	0	0	0	8	70
1	NA	NA	NA	3	0	0	0	1	0	0	0	0	0	0	0	0	0	0	0	0	0	0	0	0	1	1	1	63	f	0	1	0	1	0	1	1	0	0	0	0	1	1	0	0	0	0	0	6	67
1	NA	NA	NA	3	0	0	0	0	0	0	0	0	0	0	0	0	0	0	1	0	0	0	0	0	1	0	NA	82	f	1	0	0	1	0	0	1	0	0	0	0	0	0	0	0	0	0	0	12	42
1	NA	NA	NA	25	0	1	0	1	0	0	0	0	0	0	0	0	0	0	0	0	0	0	0	0	0	1	3	56	m	1	0	0	0	0	0	1	0	1	0	0	1	0	0	0	0	1	1	8	36
1	NA	NA	NA	5	0	1	0	0	0	0	0	0	0	0	0	0	0	1	0	0	0	0	0	0	0	0	NA	77	f	1	0	0	1	0	1	1	1	0	0	0	1	0	0	0	0	0	0	3	41
1	NA	NA	NA	10	0	1	0	0	0	0	0	0	0	0	0	0	0	0	0	0	0	0	1	0	0	0	NA	79	m	1	0	1	0	0	1	1	0	0	0	0	0	0	0	0	0	0	1	5	55
1	NA	NA	NA	27	0	1	1	0	0	0	0	0	0	0	0	0	0	0	0	0	0	0	0	0	0	0	NA	82	m	1	0	1	0	0	1	1	0	0	0	0	0	0	0	0	0	0	0	12	80
1	NA	NA	NA	32	0	1	0	0	0	0	0	0	0	1	0	0	0	0	0	0	0	0	0	0	0	0	NA	57	m	1	0	0	1	1	0	0	0	0	0	0	0	0	0	1	0	0	0	10	38
1	NA	NA	NA	10	0	0	0	1	0	0	0	0	0	0	0	0	0	0	0	0	0	0	0	0	0	0	NA	62	m	1	0	1	0	0	1	1	0	0	0	0	0	0	0	0	0	0	0	6	34
1	NA	NA	NA	4	0	1	1	0	0	0	0	0	0	0	0	0	0	0	0	0	0	0	0	0	0	0	NA	37	m	1	0	1	0	0	0	0	0	0	0	0	0	0	0	1	0	0	0	NA	62
1	NA	NA	NA	13	0	1	0	0	0	0	0	0	0	0	0	0	0	0	0	0	1	0	0	0	1	0	NA	73	m	1	0	1	0	0	0	1	0	0	0	0	0	0	0	0	0	0	0	9	46
1	NA	NA	NA	2	0	1	0	0	0	0	0	0	0	0	0	1	0	0	0	0	0	0	0	0	0	0	NA	47	m	1	0	0	1	0	1	1	0	0	0	0	0	0	0	1	0	1	1	6	33
1	NA	NA	NA	7	0	1	0	0	0	0	1	0	0	0	0	0	0	0	0	0	0	0	0	0	0	0	NA	66	m	1	0	1	0	0	0	1	0	0	0	0	0	0	0	0	0	1	1	5	32
1	NA	NA	NA	4	0	0	1	0	0	0	0	0	0	0	0	0	0	0	0	0	0	0	0	0	0	0	NA	61	f	1	0	1	0	0	0	1	0	0	0	0	0	0	0	1	0	0	0	11	92
1	NA	NA	NA	2	0	0	0	0	0	0	0	0	0	0	0	0	1	0	0	0	0	0	0	0	0	1	2	54	m	1	0	0	1	0	1	1	0	0	0	0	1	1	0	0	0	0	0	3	33
1	NA	NA	NA	3	0	0	0	1	0	0	0	0	0	0	0	0	0	0	0	0	0	0	0	0	0	0	NA	60	m	1	0	0	1	1	1	0	0	0	0	0	0	1	0	0	0	1	0	11	59
1	NA	NA	NA	10	1	1	1	0	0	0	0	0	0	0	0	0	0	0	0	0	0	0	0	0	1	0	NA	64	m	1	0	0	1	1	0	0	0	0	0	0	1	1	0	0	0	0	0	11	97
1	NA	NA	NA	46	0	0	0	0	0	0	0	0	0	0	0	0	0	0	0	0	0	0	1	0	0	1	1	72	m	1	0	0	0	1	0	0	0	0	0	0	0	1	0	0	0	0	0	3	38
1	NA	NA	NA	3	0	1	0	0	0	0	0	0	0	0	0	0	0	0	1	0	0	0	0	0	0	0	NA	61	m	1	0	1	0	0	0	0	0	0	1	0	1	0	0	0	0	0	0	5	52
1	NA	NA	NA	12	0	1	0	1	0	0	0	0	0	0	0	0	0	0	0	0	0	0	0	0	0	1	1	75	m	1	0	1	0	0	0	0	0	0	0	0	0	0	0	0	0	0	0	4	31
1	NA	NA	NA	9	0	0	0	0	0	0	0	0	0	0	0	0	0	0	0	0	0	0	1	0	0	0	NA	80	m	1	0	0	1	1	0	0	0	0	0	0	1	0	0	0	0	0	0	4	98
1	NA	NA	NA	12	1	1	1	0	0	0	0	0	0	0	0	0	0	0	0	0	0	0	0	0	0	0	NA	65	f	1	0	1	0	0	0	1	0	0	0	0	0	0	0	0	0	1	1	12	65
1	NA	NA	NA	4	0	0	0	1	0	0	0	0	0	0	0	0	0	0	0	0	0	0	0	0	0	1	4	83	m	1	0	0	1	0	1	0	0	0	0	0	1	0	0	0	0	0	0	13	70
1	NA	NA	NA	8	0	1	0	0	0	0	1	0	0	0	0	0	0	0	0	0	0	0	0	0	0	0	NA	88	m	1	0	0	1	0	1	1	1	0	0	0	0	0	0	0	0	0	0	4	38
1	NA	NA	NA	5	0	1	0	0	0	0	0	0	0	0	1	0	0	0	0	0	0	0	0	0	0	0	NA	62	m	1	0	0	1	0	0	0	0	0	1	0	0	0	0	0	0	1	1	10	33
1	NA	NA	NA	5	0	0	0	1	0	0	0	0	0	0	0	0	0	0	0	0	0	0	0	0	0	0	NA	77	f	1	0	1	0	0	0	1	0	0	1	0	0	0	0	0	0	1	1	4	36
1	NA	NA	NA	3	0	0	1	0	0	0	0	0	0	0	0	0	0	0	0	0	0	0	0	0	0	0	NA	84	m	1	0	0	1	0	1	0	1	0	1	0	0	0	0	0	0	0	0	14	82
1	NA	NA	NA	37	0	0	1	0	0	0	0	0	0	0	0	0	0	0	0	0	0	0	0	0	1	1	1	59	m	1	0	0	0	1	0	0	0	0	0	0	0	0	0	0	0	1	1	6	37
1	NA	NA	NA	20	0	0	0	1	0	0	0	0	0	0	0	0	0	0	0	0	0	0	0	0	1	1	1	62	m	1	0	1	0	0	1	1	1	0	0	0	0	0	0	0	0	0	0	11	40
1	NA	NA	NA	9	0	1	0	0	0	0	0	0	0	0	1	0	0	0	0	0	0	0	0	0	0	0	NA	39	f	1	0	1	0	0	0	0	0	0	0	0	0	1	0	0	0	0	0	4	49
1	NA	NA	NA	17	0	0	0	0	0	1	0	0	0	0	0	0	0	0	0	0	0	0	0	0	0	0	NA	66	m	1	0	0	1	0	0	1	0	0	0	0	1	1	0	0	0	0	0	3	38
1	NA	NA	NA	12	0	1	0	1	0	0	0	0	0	0	0	0	0	0	0	0	0	0	0	0	0	1	1	65	m	1	0	0	1	0	0	1	0	0	0	0	0	0	0	0	0	0	0	8	36
1	NA	NA	NA	3	0	1	0	0	0	0	1	0	0	0	0	0	0	0	0	0	0	0	0	0	1	0	NA	51	f	1	0	1	0	0	0	1	0	0	0	0	0	0	0	0	0	0	1		43
1	NA	NA	NA	37	1	0	0	1	0	0	0	0	0	0	0	0	0	0	0	0	0	0	0	0	0	0	NA	31	m	1	0	1	0	0	0	0	0	0	0	0	1	1	0	0	0	0	1	11	54
1	NA	NA	NA	11	0	1	0	0	0	0	0	0	0	0	0	0	0	0	0	0	0	0	1	0	0	0	NA	80	f	1	0	0	1	0	0	1	0	0	0	0	0	0	1	0	0	0	0	5	65
1	NA	NA	NA	2	0	0	0	0	0	0	1	0	0	0	0	0	0	0	0	0	0	0	0	0	0	0	NA	78	f	1	0	1	0	0	1	1	0	0	0	0	0	0	0	0	0	0	0	9	37
1	NA	NA	NA	6	0	0	0	0	0	0	0	0	0	0	0	0	0	0	0	1	0	0	0	0	1	0	NA	73	m	1	0	1	0	0	1	1	0	0	0	0	0	0	0	0	0	0	0	4	59
1	NA	NA	NA	4	0	1	0	0	0	0	1	0	0	0	0	0	0	0	0	0	0	0	0	0	0	0	NA	70	m	1	0	0	1	1	0	1	0	0	0	0	1	0	0	0	0	0	0	3	32
1	NA	NA	NA	16	1	1	0	0	0	0	0	0	0	0	0	0	1	0	0	0	0	0	0	0	0	1	2	52	m	1	0	1	0	0	0	0	0	0	0	0	0	0	0	0	0	1	1	8	66
1	NA	NA	NA	40	1	1	0	1	0	0	0	0	0	0	0	0	0	0	0	0	0	0	0	0	0	0	NA	71	m	1	0	1	0	0	0	0	0	0	0	0	1	1	0	0	0	0	0	8	93
1	NA	NA	NA	4	0	0	0	0	0	0	0	1	0	0	0	0	0	0	0	0	0	0	0	0	0	0	NA	75	m	1	0	0	1	0	0	0	0	0	0	0	0	0	0	0	0	0	1	3	37
1	NA	NA	NA	3	0	0	0	1	0	0	0	0	0	0	0	0	0	0	0	0	0	0	0	0	0	0	NA	78	f	1	0	1	0	0	0	0	0	0	0	0	0	0	0	0	0	0	0	13	84
1	NA	NA	NA	3	0	0	0	0	0	0	0	0	0	0	0	0	0	0	0	1	0	0	0	0	0	0	NA	69	m	1	0	1	0	0	1	0	0	0	0	0	0	0	0	0	0	0	0	4	42
1	NA	NA	NA	30	1	1	0	1	0	0	0	0	0	0	0	0	0	0	0	0	0	0	0	0	0	1	1	76	f	1	0	0	1	1	0	1	0	0	0	1	0	0	0	0	0	1	0	8	26
1	NA	NA	NA	6	0	0	0	0	1	0	0	0	0	0	0	0	0	0	0	0	0	0	0	0	0	0	NA	66	m	1	0	0	1	0	1	1	0	0	0	0	1	1	0	0	0	0	0	7	46
1	NA	NA	NA	45	0	0	0	0	0	1	0	0	0	0	0	0	0	0	0	0	0	0	0	0	0	0	NA	71	m	1	0	0	1	0	0	1	1	0	0	0	1	1	0	0	0	1	0	17	113
1	NA	NA	NA	2	0	1	1	0	0	0	0	0	0	0	0	0	0	0	0	0	0	0	0	0	0	0	NA	84	m	1	0	0	1	0	0	0	0	0	0	0	0	0	0	0	0	0	0	7	42
1	NA	NA	NA	3	0	0	0	0	0	0	0	0	0	0	0	0	0	1	0	0	0	0	0	0	0	0	NA	58	f	1	0	1	0	0	1	1	0	1	1	0	0	0	0	0	0	0	0	9	33
1	NA	NA	NA	7	0	1	1	0	0	0	0	0	0	0	0	0	0	0	0	0	0	0	0	0	0	0	NA	72	m	1	0	1	0	0	0	1	0	0	0	0	0	0	0	0	0	0	1	13	64
1	NA	NA	NA	5	0	1	0	0	0	0	0	0	0	0	0	0	0	0	0	0	0	0	1	0	0	0	NA	55	f	1	0	1	0	0	0	0	0	0	0	0	0	0	0	1	0	0	0	7	54
[truncated: 35 more columns]
